# Supplementary material
Source: publisher figshare collection journal article supplement (https://acs.figshare.com/ndownloader/files/9566542)
Supplement: Supplementary file 1 [file 9566542]

 
data_rrm8_0m 
 
_audit_creation_method            SHELXL-97 
_chemical_name_systematic 
; 
 ? 
; 
_chemical_name_common             ? 
_chemical_melting_point           ? 
_chemical_formula_moiety          'C15 H14 N4 O4' 
_chemical_formula_sum             'C15 H14 N4 O4'
_chemical_formula_weight          314.30 
 
loop_ 
 _atom_type_symbol 
 _atom_type_description 
 _atom_type_scat_dispersion_real 
 _atom_type_scat_dispersion_imag 
 _atom_type_scat_source 
 'C'  'C'   0.0033   0.0016 
 'International Tables Vol C Tables 4.2.6.8 and 6.1.1.4' 
 'H'  'H'   0.0000   0.0000 
 'International Tables Vol C Tables 4.2.6.8 and 6.1.1.4' 
 'N'  'N'   0.0061   0.0033 
 'International Tables Vol C Tables 4.2.6.8 and 6.1.1.4' 
 'O'  'O'   0.0106   0.0060 
 'International Tables Vol C Tables 4.2.6.8 and 6.1.1.4' 
 
_symmetry_cell_setting            'Monoclinic'
_symmetry_space_group_name_H-M    'P2(1)/n' 
 
loop_ 
 _symmetry_equiv_pos_as_xyz 
 'x, y, z' 
 '-x+1/2, y+1/2, -z+1/2' 
 '-x, -y, -z' 
 'x-1/2, -y-1/2, z-1/2' 
 
_cell_length_a                    8.006(14) 
_cell_length_b                    12.99(2) 
_cell_length_c                    14.70(2) 
_cell_angle_alpha                 90.00 
_cell_angle_beta                  100.16(2) 
_cell_angle_gamma                 90.00 
_cell_volume                      1504(5) 
_cell_formula_units_Z             4 
_cell_measurement_temperature     296(2) 
_cell_measurement_reflns_used     882 
_cell_measurement_theta_min       2.72
_cell_measurement_theta_max       20.51 
 
_exptl_crystal_description        prismatic 
_exptl_crystal_colour             colorless 
_exptl_crystal_size_max           0.88 
_exptl_crystal_size_mid           0.70 
_exptl_crystal_size_min           0.45 
_exptl_crystal_density_meas       ? 
_exptl_crystal_density_diffrn     1.387
_exptl_crystal_density_method     'not measured' 
_exptl_crystal_F_000              600 
_exptl_absorpt_coefficient_mu     0.104 
_exptl_absorpt_correction_type    multi-scan  
_exptl_absorpt_correction_T_min   0.9448 
_exptl_absorpt_correction_T_max   0.9697 
_exptl_absorpt_process_details    ? 
 
_exptl_special_details 
; 
 ? 
; 
 
_diffrn_ambient_temperature       296(2) 
_diffrn_radiation_wavelength      0.71073 
_diffrn_radiation_type            MoK\a 
_diffrn_radiation_source          'fine-focus sealed tube' 
_diffrn_radiation_monochromator   graphite 
_diffrn_measurement_device_type   'Bruker APEX-II CCD'
_diffrn_measurement_method        ? 
_diffrn_detector_area_resol_mean  ? 
_diffrn_reflns_number             5418 
_diffrn_reflns_av_R_equivalents   0.0513
_diffrn_reflns_av_sigmaI/netI     0.0425 
_diffrn_reflns_limit_h_min        -8 
_diffrn_reflns_limit_h_max        8 
_diffrn_reflns_limit_k_min        -13 
_diffrn_reflns_limit_k_max        13 
_diffrn_reflns_limit_l_min        -13 
_diffrn_reflns_limit_l_max        15 
_diffrn_reflns_theta_min          2.11 
_diffrn_reflns_theta_max          30.60  
_reflns_number_total              1864 
_reflns_number_gt                 1221 
_reflns_threshold_expression      >2sigma(I) 
 
_computing_data_collection        ? 
_computing_cell_refinement        ? 
_computing_data_reduction         ? 
_computing_structure_solution     'SHELXS-97 (Sheldrick, 2008)' 
_computing_structure_refinement   'SHELXL-97 (Sheldrick, 2008)' 
_computing_molecular_graphics     ? 
_computing_publication_material   ? 
 
_refine_special_details 
; 
 Refinement of F^2^ against ALL reflections.  The weighted R-factor wR and 
 goodness of fit S are based on F^2^, conventional R-factors R are based 
 on F, with F set to zero for negative F^2^. The threshold expression of 
 F^2^ > 2sigma(F^2^) is used only for calculating R-factors(gt) etc. and is 
 not relevant to the choice of reflections for refinement.  R-factors based 
 on F^2^ are statistically about twice as large as those based on F, and R- 
 factors based on ALL data will be even larger. 
; 
 
_refine_ls_structure_factor_coef  Fsqd  
_refine_ls_matrix_type            full 
_refine_ls_weighting_scheme       calc  
_refine_ls_weighting_details 
 'calc w=1/[\s^2^(Fo^2^)+(0.1143P)^2^+0.0000P] where P=(Fo^2^+2Fc^2^)/3' 
_atom_sites_solution_primary      direct 
_atom_sites_solution_secondary    difmap 
_atom_sites_solution_hydrogens    geom 
_refine_ls_hydrogen_treatment     mixed 
_refine_ls_extinction_method      none 
_refine_ls_extinction_coef        ? 
_refine_ls_number_reflns          1864 
_refine_ls_number_parameters      208 
_refine_ls_number_restraints      0 
_refine_ls_R_factor_all           0.0780 
_refine_ls_R_factor_gt            0.0506 
_refine_ls_wR_factor_ref          0.1549 
_refine_ls_wR_factor_gt           0.1306 
_refine_ls_goodness_of_fit_ref    0.863 
_refine_ls_restrained_S_all       0.863 
_refine_ls_shift/su_max           0.050 
_refine_ls_shift/su_mean          0.000 
 
loop_ 
 _atom_site_label 
 _atom_site_type_symbol 
 _atom_site_fract_x 
 _atom_site_fract_y 
 _atom_site_fract_z 
 _atom_site_U_iso_or_equiv 
 _atom_site_adp_type 
 _atom_site_occupancy 
 _atom_site_symmetry_multiplicity 
 _atom_site_calc_flag 
 _atom_site_refinement_flags 
 _atom_site_disorder_assembly 
 _atom_site_disorder_group 
O2 O 0.0514(3) 0.13149(17) 0.20983(17) 0.0781(8) Uani 1 1 d . . . 
O3 O 0.4559(3) 0.1690(2) -0.1742(2) 0.0951(9) Uani 1 1 d . . . 
O4 O 0.5778(3) 0.2852(2) -0.0796(2) 0.1079(11) Uani 1 1 d . . . 
N3 N 0.2138(3) 0.05287(15) 0.05097(17) 0.0455(7) Uani 1 1 d . . . 
N2 N 0.2899(3) 0.06399(15) -0.03410(16) 0.0467(7) Uani 1 1 d . . . 
O1 O -0.0651(3) 0.25658(18) 0.12443(18) 0.0789(8) Uani 1 1 d . . . 
N4 N 0.0594(3) 0.2099(2) 0.16449(19) 0.0558(7) Uani 1 1 d . . . 
C15 C 0.2278(3) 0.25278(18) 0.15952(19) 0.0442(8) Uani 1 1 d . . . 
C10 C 0.3618(3) 0.18902(19) 0.14706(19) 0.0428(7) Uani 1 1 d . . . 
C9 C 0.3459(4) 0.07426(19) 0.1318(2) 0.0499(8) Uani 1 1 d . . . 
H9A H 0.4535 0.0463 0.1218 0.060 Uiso 1 1 calc R . . 
H9B H 0.3164 0.0415 0.1862 0.060 Uiso 1 1 calc R . . 
C7 C 0.1585(4) 0.1012(2) -0.1098(2) 0.0563(8) Uani 1 1 d . . . 
H7A H 0.0497 0.0721 -0.1034 0.068 Uiso 1 1 calc R . . 
H7B H 0.1851 0.0785 -0.1685 0.068 Uiso 1 1 calc R . . 
C2 C 0.1472(4) 0.2170(2) -0.1091(2) 0.0499(8) Uani 1 1 d . . . 
C1 C 0.2831(4) 0.2825(2) -0.1113(2) 0.0597(9) Uani 1 1 d . . . 
N1 N 0.4520(4) 0.2419(3) -0.1219(3) 0.0779(10) Uani 1 1 d . . . 
C3 C -0.0036(4) 0.2640(2) -0.1015(2) 0.0583(9) Uani 1 1 d . . . 
H3 H -0.0982 0.2232 -0.0992 0.070 Uiso 1 1 calc R . . 
C4 C -0.0194(4) 0.3696(3) -0.0970(3) 0.0738(10) Uani 1 1 d . . . 
H4 H -0.1242 0.3986 -0.0934 0.089 Uiso 1 1 calc R . . 
C5 C 0.1178(5) 0.4316(3) -0.0979(3) 0.0890(13) Uani 1 1 d . . . 
H5 H 0.1071 0.5027 -0.0947 0.107 Uiso 1 1 calc R . . 
C6 C 0.2719(4) 0.3878(2) -0.1036(3) 0.0831(12) Uani 1 1 d . . . 
H6 H 0.3675 0.4289 -0.1023 0.100 Uiso 1 1 calc R . . 
C8 C 0.2519(3) -0.0361(2) -0.00079(18) 0.0533(9) Uani 1 1 d . . . 
H8A H 0.1571 -0.0735 -0.0360 0.064 Uiso 1 1 calc R . . 
H8B H 0.3468 -0.0790 0.0266 0.064 Uiso 1 1 calc R . . 
C14 C 0.2435(4) 0.35828(19) 0.1677(2) 0.0574(9) Uani 1 1 d . . . 
H14 H 0.1508 0.3986 0.1750 0.069 Uiso 1 1 calc R . . 
C13 C 0.3984(4) 0.4031(2) 0.1649(2) 0.0637(10) Uani 1 1 d . . . 
H13 H 0.4118 0.4740 0.1718 0.076 Uiso 1 1 calc R . . 
C12 C 0.5319(4) 0.3432(2) 0.1521(2) 0.0647(10) Uani 1 1 d . . . 
H12 H 0.6361 0.3735 0.1494 0.078 Uiso 1 1 calc R . . 
C11 C 0.5137(4) 0.2381(2) 0.1430(2) 0.0537(9) Uani 1 1 d . . . 
H11 H 0.6065 0.1988 0.1339 0.064 Uiso 1 1 calc R . . 
 
loop_ 
 _atom_site_aniso_label 
 _atom_site_aniso_U_11 
 _atom_site_aniso_U_22 
 _atom_site_aniso_U_33 
 _atom_site_aniso_U_23 
 _atom_site_aniso_U_13 
 _atom_site_aniso_U_12 
O2 0.0919(18) 0.0675(14) 0.0864(19) -0.0023(13) 0.0471(15) -0.0168(12) 
O3 0.099(2) 0.1028(19) 0.099(2) 0.0355(17) 0.0602(18) 0.0351(16) 
O4 0.0514(17) 0.145(2) 0.130(3) 0.039(2) 0.0237(18) 0.0041(16) 
N3 0.0466(15) 0.0440(13) 0.0478(16) -0.0021(11) 0.0140(13) -0.0031(10) 
N2 0.0485(15) 0.0476(13) 0.0454(17) 0.0010(11) 0.0126(13) 0.0034(10) 
O1 0.0443(14) 0.0996(17) 0.092(2) -0.0104(14) 0.0109(14) -0.0001(12) 
N4 0.0518(18) 0.0661(16) 0.053(2) -0.0179(14) 0.0194(15) -0.0065(14) 
C15 0.0388(17) 0.0544(16) 0.039(2) -0.0032(13) 0.0073(14) -0.0029(13) 
C10 0.0451(18) 0.0492(15) 0.0322(19) -0.0026(12) 0.0015(14) 0.0019(13) 
C9 0.0530(18) 0.0504(15) 0.044(2) 0.0030(13) 0.0036(16) 0.0080(13) 
C7 0.060(2) 0.0626(18) 0.045(2) 0.0003(14) 0.0047(17) 0.0032(15) 
C2 0.0457(19) 0.0653(18) 0.039(2) 0.0137(14) 0.0081(15) 0.0079(15) 
C1 0.0458(19) 0.069(2) 0.067(3) 0.0257(16) 0.0177(17) 0.0158(16) 
N1 0.060(2) 0.092(2) 0.088(3) 0.045(2) 0.032(2) 0.0170(18) 
C3 0.0455(19) 0.072(2) 0.058(2) 0.0097(16) 0.0090(17) 0.0062(15) 
C4 0.054(2) 0.081(2) 0.088(3) 0.0182(19) 0.020(2) 0.0233(18) 
C5 0.082(3) 0.0565(19) 0.130(4) 0.025(2) 0.022(3) 0.015(2) 
C6 0.058(2) 0.067(2) 0.125(4) 0.033(2) 0.019(2) 0.0037(17) 
C8 0.061(2) 0.0425(15) 0.056(2) -0.0066(13) 0.0117(18) -0.0008(13) 
C14 0.053(2) 0.0524(17) 0.066(2) -0.0125(15) 0.0073(17) 0.0008(14) 
C13 0.065(2) 0.0506(17) 0.075(3) -0.0113(15) 0.0104(19) -0.0108(16) 
C12 0.051(2) 0.066(2) 0.077(3) -0.0130(17) 0.0118(18) -0.0197(16) 
C11 0.0422(18) 0.0691(19) 0.050(2) -0.0079(15) 0.0091(16) -0.0020(14) 
 
_geom_special_details 
; 
 All esds (except the esd in the dihedral angle between two l.s. planes) 
 are estimated using the full covariance matrix.  The cell esds are taken 
 into account individually in the estimation of esds in distances, angles 
 and torsion angles; correlations between esds in cell parameters are only 
 used when they are defined by crystal symmetry.  An approximate (isotropic) 
 treatment of cell esds is used for estimating esds involving l.s. planes. 
; 
 
loop_ 
 _geom_bond_atom_site_label_1 
 _geom_bond_atom_site_label_2 
 _geom_bond_distance 
 _geom_bond_site_symmetry_2 
 _geom_bond_publ_flag 
O2 N4 1.225(3) . ? 
O3 N1 1.224(4) . ? 
O4 N1 1.223(4) . ? 
N3 C8 1.445(4) . ? 
N3 C9 1.471(4) . ? 
N3 N2 1.491(4) . ? 
N2 C8 1.441(4) . ? 
N2 C7 1.472(4) . ? 
O1 N4 1.225(3) . ? 
N4 C15 1.472(4) . ? 
C15 C14 1.379(4) . ? 
C15 C10 1.393(4) . ? 
C10 C11 1.383(4) . ? 
C10 C9 1.509(4) . ? 
C9 H9A 0.9700 . ? 
C9 H9B 0.9700 . ? 
C7 C2 1.506(4) . ? 
C7 H7A 0.9700 . ? 
C7 H7B 0.9700 . ? 
C2 C3 1.375(4) . ? 
C2 C1 1.386(4) . ? 
C1 C6 1.377(5) . ? 
C1 N1 1.485(5) . ? 
C3 C4 1.379(5) . ? 
C3 H3 0.9300 . ? 
C4 C5 1.364(5) . ? 
C4 H4 0.9300 . ? 
C5 C6 1.374(5) . ? 
C5 H5 0.9300 . ? 
C6 H6 0.9300 . ? 
C8 H8A 0.9700 . ? 
C8 H8B 0.9700 . ? 
C14 C13 1.377(4) . ? 
C14 H14 0.9300 . ? 
C13 C12 1.362(4) . ? 
C13 H13 0.9300 . ? 
C12 C11 1.376(4) . ? 
C12 H12 0.9300 . ? 
C11 H11 0.9300 . ? 
 
loop_ 
 _geom_angle_atom_site_label_1 
 _geom_angle_atom_site_label_2 
 _geom_angle_atom_site_label_3 
 _geom_angle 
 _geom_angle_site_symmetry_1 
 _geom_angle_site_symmetry_3 
 _geom_angle_publ_flag 
C8 N3 C9 112.8(2) . . ? 
C8 N3 N2 58.73(17) . . ? 
C9 N3 N2 108.5(2) . . ? 
C8 N2 C7 112.8(2) . . ? 
C8 N2 N3 59.04(15) . . ? 
C7 N2 N3 108.8(2) . . ? 
O2 N4 O1 123.9(3) . . ? 
O2 N4 C15 118.5(3) . . ? 
O1 N4 C15 117.6(3) . . ? 
C14 C15 C10 122.8(3) . . ? 
C14 C15 N4 116.2(2) . . ? 
C10 C15 N4 121.0(3) . . ? 
C11 C10 C15 115.8(3) . . ? 
C11 C10 C9 120.0(3) . . ? 
C15 C10 C9 124.0(3) . . ? 
N3 C9 C10 109.7(2) . . ? 
N3 C9 H9A 109.7 . . ? 
C10 C9 H9A 109.7 . . ? 
N3 C9 H9B 109.7 . . ? 
C10 C9 H9B 109.7 . . ? 
H9A C9 H9B 108.2 . . ? 
N2 C7 C2 111.0(2) . . ? 
N2 C7 H7A 109.4 . . ? 
C2 C7 H7A 109.4 . . ? 
N2 C7 H7B 109.4 . . ? 
C2 C7 H7B 109.4 . . ? 
H7A C7 H7B 108.0 . . ? 
C3 C2 C1 115.7(3) . . ? 
C3 C2 C7 119.9(3) . . ? 
C1 C2 C7 124.3(3) . . ? 
C6 C1 C2 123.0(3) . . ? 
C6 C1 N1 115.8(3) . . ? 
C2 C1 N1 121.2(3) . . ? 
O4 N1 O3 124.4(3) . . ? 
O4 N1 C1 117.8(4) . . ? 
O3 N1 C1 117.7(3) . . ? 
C4 C3 C2 122.3(3) . . ? 
C4 C3 H3 118.9 . . ? 
C2 C3 H3 118.9 . . ? 
C5 C4 C3 120.4(3) . . ? 
C5 C4 H4 119.8 . . ? 
C3 C4 H4 119.8 . . ? 
C4 C5 C6 119.3(3) . . ? 
C4 C5 H5 120.3 . . ? 
C6 C5 H5 120.3 . . ? 
C5 C6 C1 119.2(3) . . ? 
C5 C6 H6 120.4 . . ? 
C1 C6 H6 120.4 . . ? 
N3 C8 N2 62.2(2) . . ? 
N3 C8 H8A 117.5 . . ? 
N2 C8 H8A 117.5 . . ? 
N3 C8 H8B 117.5 . . ? 
N2 C8 H8B 117.5 . . ? 
H8A C8 H8B 114.6 . . ? 
C13 C14 C15 119.1(3) . . ? 
C13 C14 H14 120.4 . . ? 
C15 C14 H14 120.4 . . ? 
C12 C13 C14 119.7(3) . . ? 
C12 C13 H13 120.2 . . ? 
C14 C13 H13 120.2 . . ? 
C13 C12 C11 120.6(3) . . ? 
C13 C12 H12 119.7 . . ? 
C11 C12 H12 119.7 . . ? 
C12 C11 C10 122.1(3) . . ? 
C12 C11 H11 119.0 . . ? 
C10 C11 H11 119.0 . . ? 
 
_diffrn_measured_fraction_theta_max    0.966 
_diffrn_reflns_theta_full              30.60
_diffrn_measured_fraction_theta_full   0.966 
_refine_diff_density_max    0.143 
_refine_diff_density_min   -0.244 
_refine_diff_density_rms    0.055 
